# Supplementary material for: Trajectory of Smoking and Incidence of Atherosclerotic Cardiovascular Disease among Korean Young Adult Men
Source: PubMed Central journal article supplement (PMC6617148; doi:10.3390/ijerph16122219), 2019-06-24
Supplement: ijerph-16-02219-s001.pdf [file ijerph-16-02219-s001.pdf]

**Supplementary Table S1.** Model selection (no missing).

| No. | Number of groups | Trajectory shapes | BIC       |
|-----|------------------|-------------------|-----------|
| 1   | 2                | 0 1               | -537422.2 |
| 2   | 2                | 0 2               | -534935.8 |
| 3   | 3                | 0 1 1             | -508340.2 |
| 4   | 3                | 0 1 2             | -507160.4 |
| 5   | 4                | 0 1 1 1           | -501189.4 |
| 6   | 4                | 0 1 1 2           | -500673.8 |
| 7   | 5                | 0 1 1 1 2         | -485860.7 |
| 8   | 5                | 1 1 1 2 2         | -485471.7 |

BIC: Bayesian Information Criterion.

**Supplementary Table S2.** Changes in smoking amount by trajectory group by year, 1992-2004.

|                       | Trajectory group      |                     |                        |                          |                                |
|-----------------------|-----------------------|---------------------|------------------------|--------------------------|--------------------------------|
|                       | Group 1<br>Low steady | Group 2<br>Lowering | Group 3<br>High steady | Group 4<br>Rise and fall | Group 5<br>Very high<br>steady |
| N (%)                 | 17,158<br>(28.3)2     | 10,479 (17.3)1      | 8,934<br>(14.7)3       | 9,461<br>(15.6)5         | 14,679<br>(24.2)4              |
| Smoking status (1992) |                       |                     |                        |                          |                                |
| Never                 | 72.6                  | 3.8                 | 2.4                    | 0.7                      | 0.3                            |
| Ex smoker             | 24.7                  | 8.5                 | 24.8                   | 2.7                      | 0.7                            |
| 1-9 cig/day           | 2.3                   | 46.3                | 43.1                   | 16.6                     | 4.9                            |
| 10-19 cig/day         | 0.3                   | 36.2                | 23.8                   | 50.1                     | 49.5                           |
| ≥20 cig/day           | 0.1                   | 5.3                 | 6.1                    | 29.9                     | 44.7                           |
| Smoking status (1994) |                       |                     |                        |                          |                                |
| Never                 | 73.8                  | 1.5                 | 1.6                    | 0.2                      | 0.1                            |
| Ex smoker             | 24.8                  | 9.7                 | 40.8                   | 2.9                      | 0.7                            |
| 1-9 cig/day           | 1.1                   | 44.9                | 37.6                   | 13.7                     | 2.7                            |
| 10-19 cig/day         | 0.2                   | 40.0                | 17.1                   | 52.3                     | 48.8                           |
| ≥20 cig/day           | 0.1                   | 4.4                 | 2.9                    | 30.9                     | 47.7                           |
| Smoking status (1996) |                       |                     |                        |                          |                                |
| Never                 | 91.5                  | 3.7                 | 17.0                   | 0.4                      | 0.3                            |
| Ex smoker             | 7.7                   | 8.7                 | 36.9                   | 3.0                      | 1.2                            |
| 1-9 cig/day           | 0.7                   | 23.7                | 29.9                   | 4.5                      | 0.7                            |
| 10-19 cig/day         | 0.1                   | 61.8                | 15.5                   | 70.2                     | 61.6                           |
| ≥20 cig/day           | 0.0                   | 2.1                 | 0.7                    | 21.9                     | 36.1                           |
| Smoking status (1998) |                       |                     |                        |                          |                                |
| Never                 | 92.1                  | 4.4                 | 20.2                   | 1.0                      | 0.7                            |
| Ex smoker             | 6.7                   | 6.9                 | 39.2                   | 3.8                      | 1.0                            |
| 1-9 cig/day           | 1.0                   | 21.4                | 28.6                   | 4.4                      | 0.7                            |
| 10-19 cig/day         | 0.2                   | 63.0                | 11.3                   | 62.4                     | 46.7                           |
| ≥20 cig/day           | 0.1                   | 4.3                 | 0.7                    | 28.4                     | 51.1                           |
| Smoking status (2000) |                       |                     |                        |                          |                                |
| Never                 | 90.9                  | 4.9                 | 23.5                   | 3.5                      | 1.1                            |
| Ex smoker             | 7.6                   | 7.5                 | 44.3                   | 13.2                     | 1.3                            |
| 1-9 cig/day           | 1.1                   | 21.5                | 23.5                   | 6.8                      | 0.9                            |
| 10-19 cig/day         | 0.3                   | 61.4                | 8.3                    | 55.9                     | 50.6                           |
| ≥20 cig/day           | 0.0                   | 4.7                 | 0.4                    | 20.5                     | 46.2                           |
| Smoking status (2002) |                       |                     |                        |                          |                                |
| Never                 | 91.2                  | 4.7                 | 32.9                   | 18.6                     | 1.3                            |
| Ex smoker             | 6.3                   | 10.9                | 49.7                   | 43.8                     | 2.5                            |
| 1-9 cig/day           | 1.7                   | 27.8                | 14.0                   | 9.1                      | 2.9                            |

|                       |      |      |      |      |      |
|-----------------------|------|------|------|------|------|
| 10-19 cig/day         | 0.7  | 53.0 | 3.3  | 23.0 | 54.3 |
| ≥20 cig/day           | 0.1  | 3.7  | 0.1  | 5.5  | 39.1 |
| Smoking status (2004) |      |      |      |      |      |
| Never                 | 91.6 | 0.2  | 38.3 | 43.8 | 0.0  |
| Ex smoker             | 6.2  | 6.5  | 47.5 | 51.6 | 2.1  |
| 1-9 cig/day           | 1.7  | 28.5 | 11.9 | 3.5  | 2.6  |
| 10-19 cig/day         | 0.4  | 59.4 | 2.2  | 1.1  | 55.2 |
| ≥20 cig/day           | 0.1  | 5.3  | 0.1  | 0.0  | 40.1 |

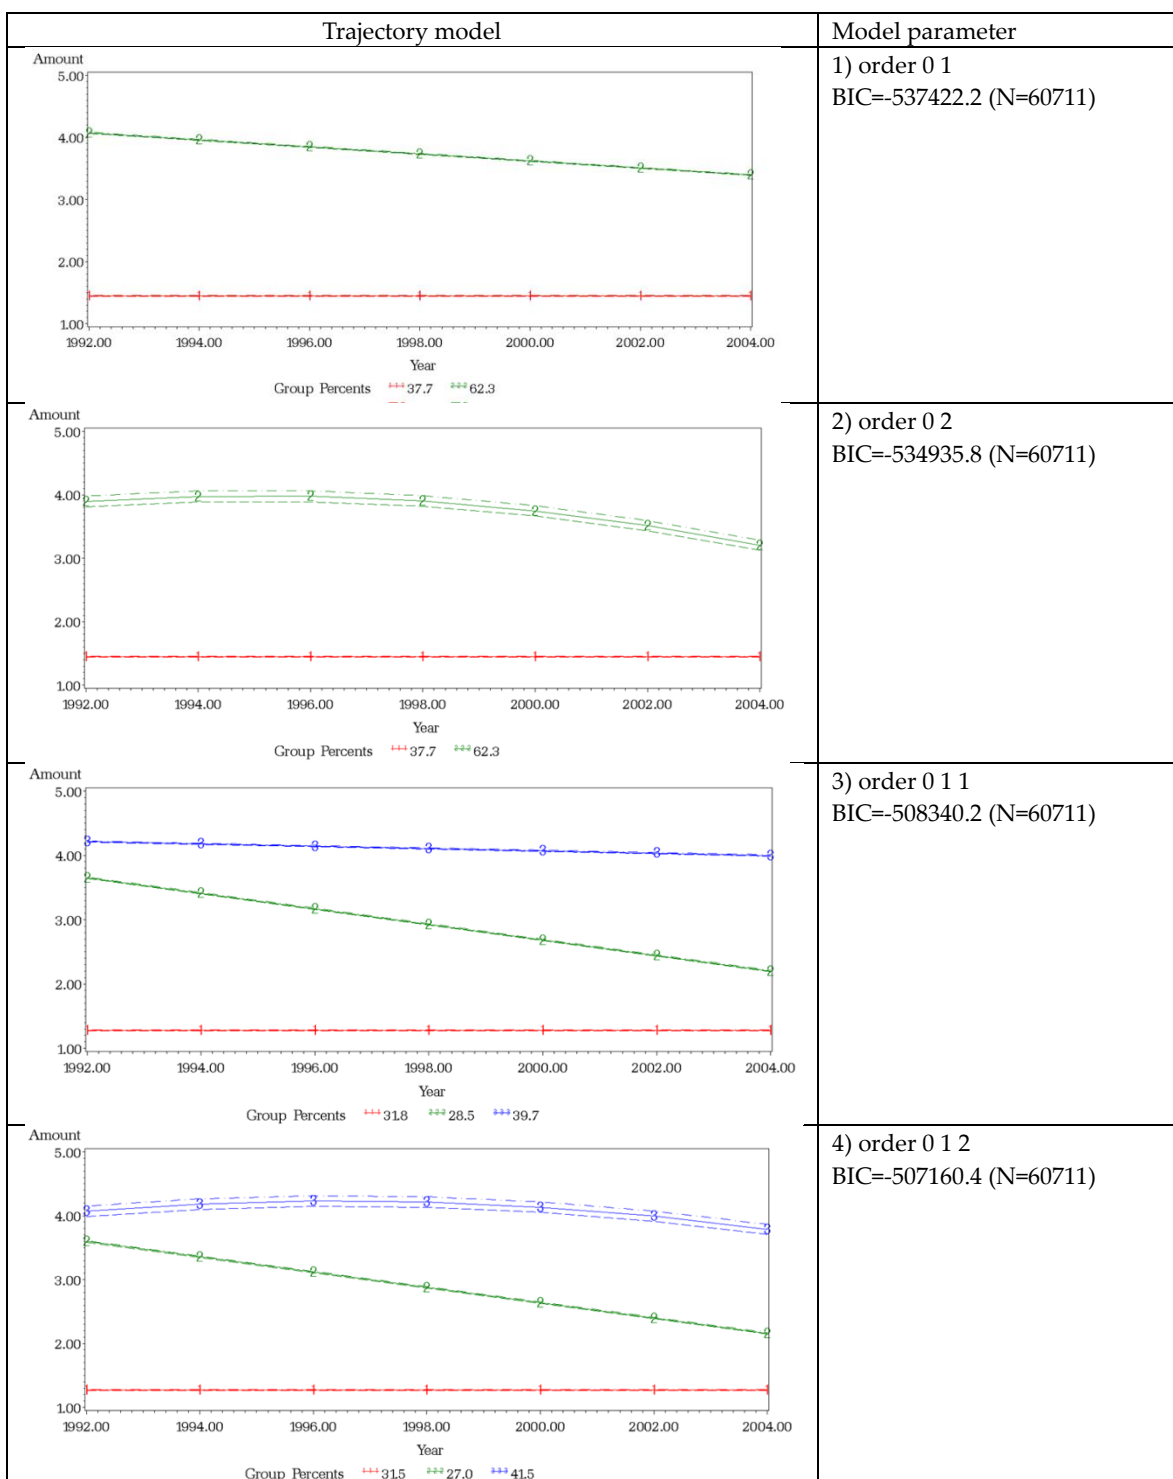

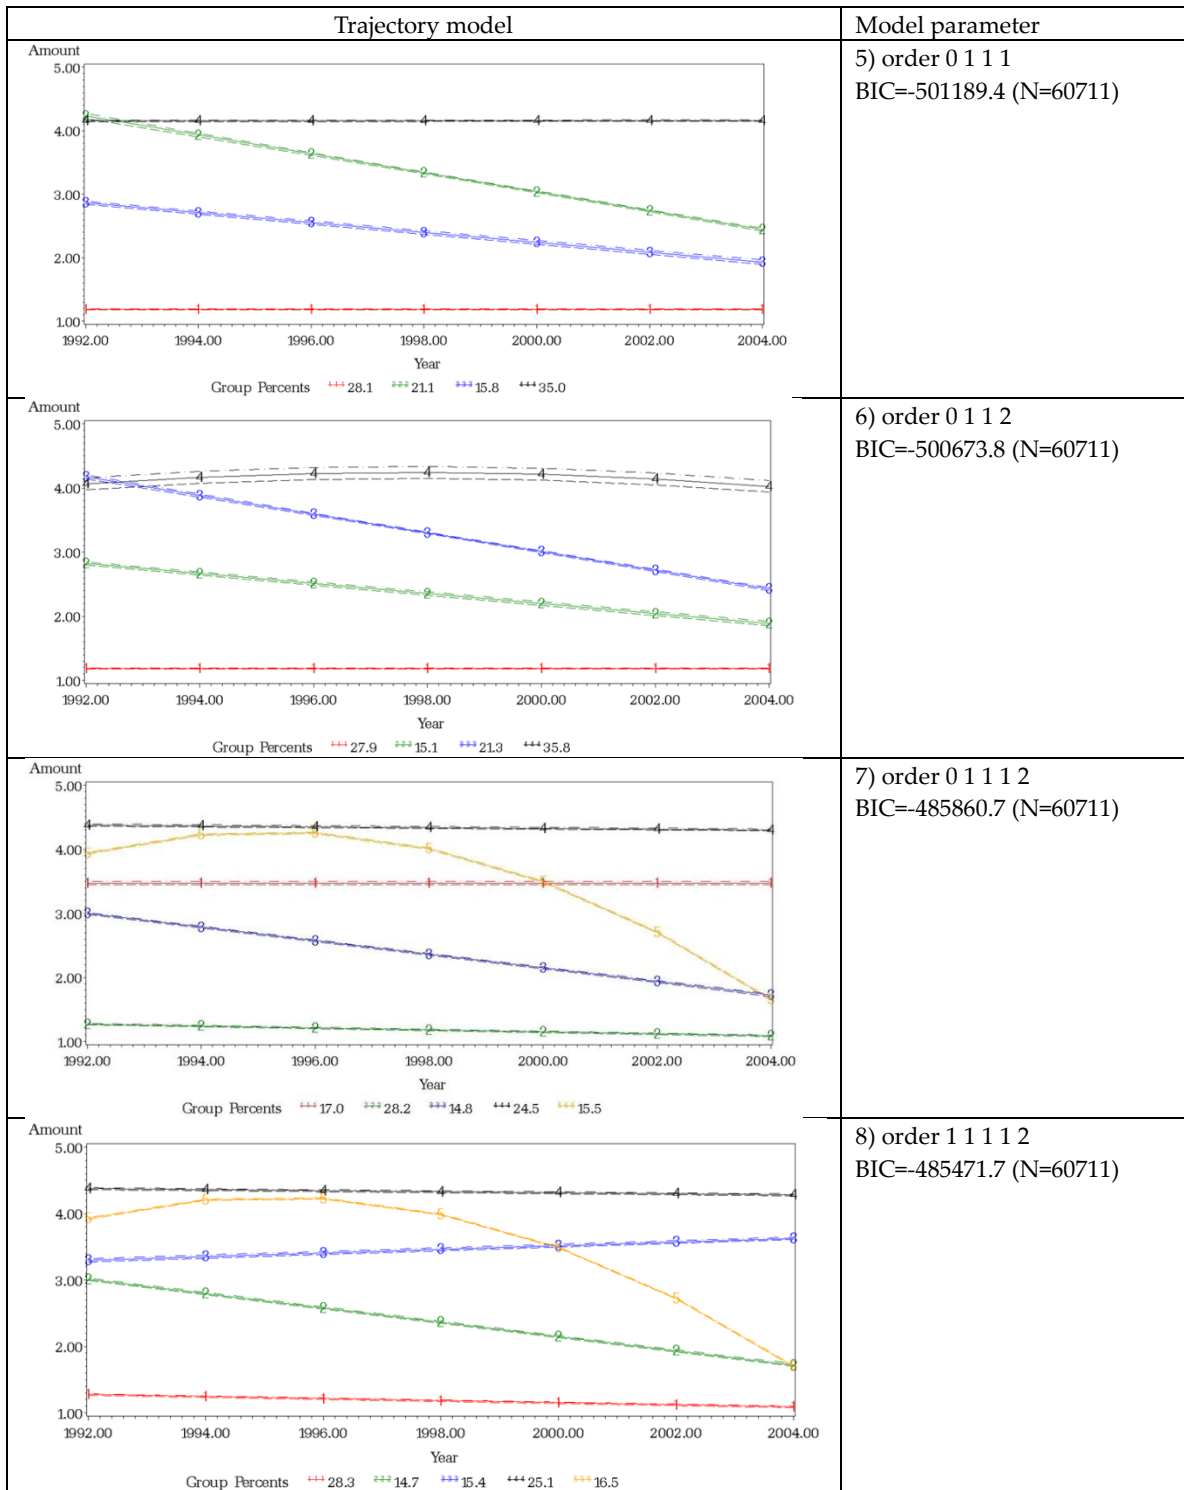

Supplementary Figure S1. Trajectory group of smoking amount for 8 models.

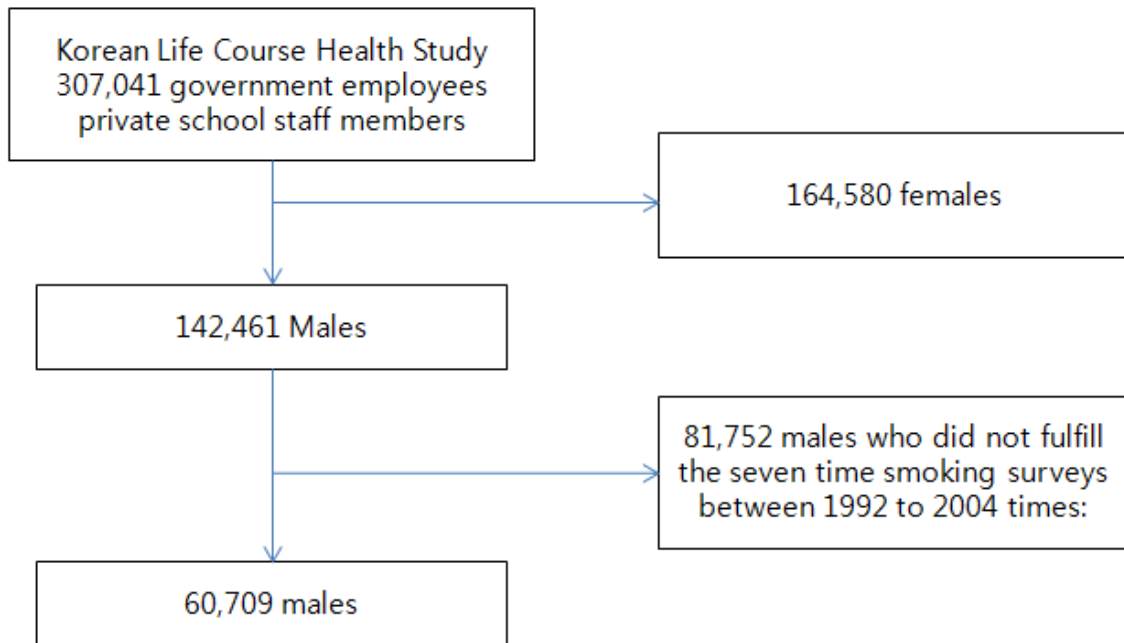

**Supplementary Figure S2.** Flow chart of participants in the study.

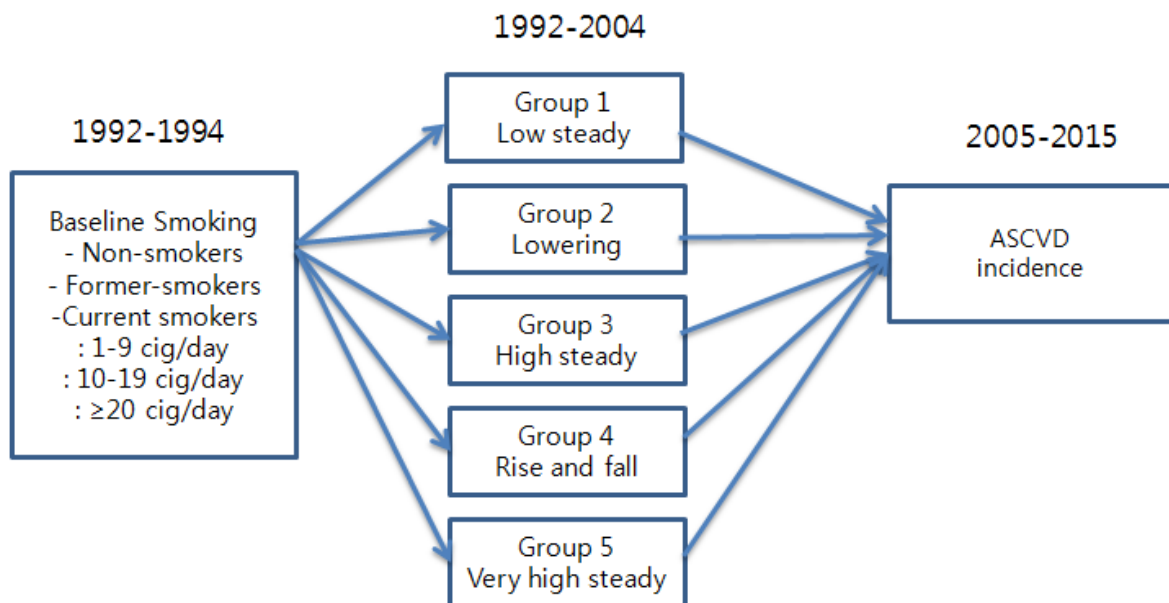

**Supplementary Figure S3.** Illustration of the study design.
